# Supplementary material
Source: Springer Nature journal article supplement (https://www.springermedizin.de/resource/supplementary/12913_2013_2517_MOESM1_ESM.pdf/9530834)
Supplement: MOESM1 [file 9530834]

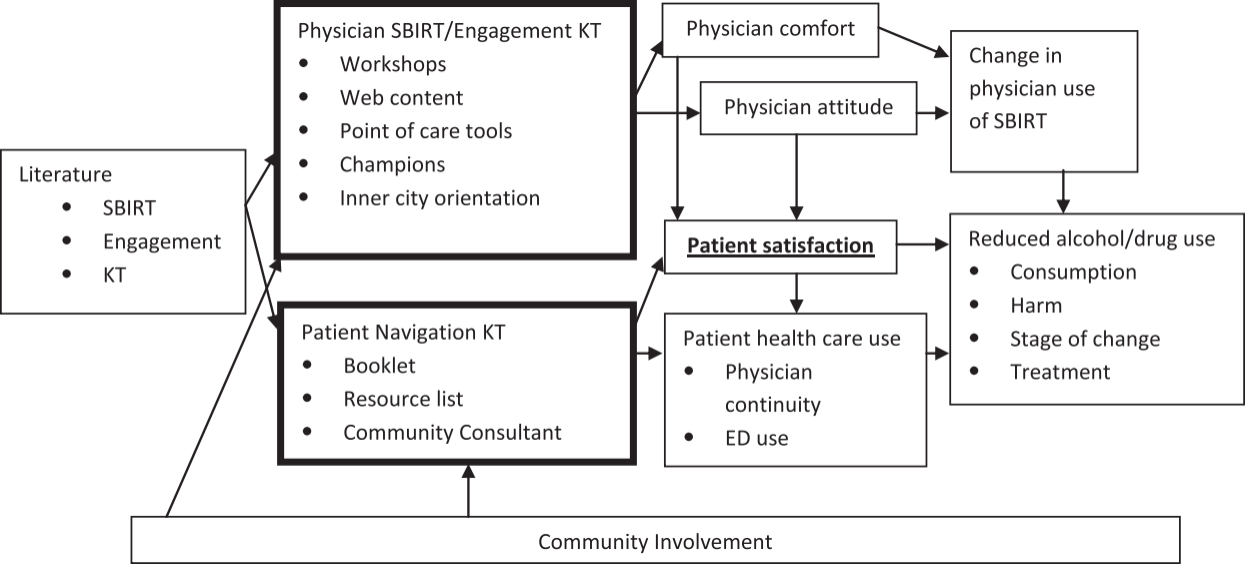

Literature

- SBIRT
- Engagement
- KT

Physician SBIRT/Engagement KT

- Workshops
- Web content
- Point of care tools
- Champions
- Inner city orientation

Patient Navigation KT

- Booklet
- Resource list
- Community Consultant

Physician comfort

Physician attitude

Patient satisfaction

Patient health care use

- Physician continuity
- ED use

Change in physician use of SBIRT

Reduced alcohol/drug use

- Consumption
- Harm
- Stage of change
- Treatment

Community Involvement
